# Supplementary material
Source: PubMed Central journal article supplement (PMC8566638)
Supplement: 259_2021_5444_MOESM3_ESM.pdf [file 259_2021_5444_MOESM3_ESM.pdf]

---

# Impact of COVID-19 on Nuclear Medicine Practices Worldwide

The COVID-19 pandemic has led to profound disruptions in the delivery of healthcare and nuclear medicine is no exception.

In March 2020 the IAEA conducted a survey to evaluate the impact of the pandemic on nuclear medicine departments, published in JNM in September 2020 (PMID: [32709733](#)).

A follow-up survey is now being implemented to understand and identify the long-term effects of this pandemic, evaluate them and propose global solutions.

The higher the participation the more meaningful the results will be to support countries to identify challenges and address them. We kindly ask you for 5 minutes of your time to fill out this survey.

## Organization

\* Country/Administrative Area

Choose one of the following... ▲

Province/State/Territory

\* City

Name of Institution

\* Type of institution

- Hospital
- University hospital
- Private practice

---

## About Yourself

Your First/Given Name

Your Family Name/Surname

If you wish to stay in touch with us then please share your email here

Your profession (please choose one main one which reflects your major specialty)?

- Nuclear medicine specialist
- Radiologist
- Medical Physicist
- Radiopharmacist
- Technologist
- Other

*Other*

## Nuclear Medicine Practice

What was the percentage of outpatients in your department before COVID-19?

Was there a change in the percentage of outpatients in your department in June 2020 compared to January 2020 or prior to the COVID pandemic?

- Increased
- Decreased
- No change

Was there a change in the percentage of outpatients in your department in October 2020 compared to January 2020 or prior to the COVID pandemic?

- Increased
- Decreased
- No change

Do you perform general nuclear medicine (SPECT) procedures in your department?

- Yes  No

Do you perform PET scans in your department?  Yes  No

Do you perform radionuclide therapies in your department?  Yes  No

**Compared to usual activity (January 2020 – prior to the begin of the pandemic) : How did SPECT procedures change?**

**-100% (complete absence of exams after COVID),**

**0% (exams as usual)**

**+100% (double the number of exams)**

**Not applicable if these studies are not performed in your department**

|                                                              | Yes                      | June 2020            | Oct. 2020            |
|--------------------------------------------------------------|--------------------------|----------------------|----------------------|
| Bone scans                                                   | <input type="checkbox"/> | <input type="text"/> | <input type="text"/> |
| Myocardial perfusion imaging                                 | <input type="checkbox"/> | <input type="text"/> | <input type="text"/> |
| Lung scans                                                   | <input type="checkbox"/> | <input type="text"/> | <input type="text"/> |
| Renal scans                                                  | <input type="checkbox"/> | <input type="text"/> | <input type="text"/> |
| Thyroid studies                                              | <input type="checkbox"/> | <input type="text"/> | <input type="text"/> |
| Sentinel node detection                                      | <input type="checkbox"/> | <input type="text"/> | <input type="text"/> |
| Parathyroid scan                                             | <input type="checkbox"/> | <input type="text"/> | <input type="text"/> |
| Brain studies                                                | <input type="checkbox"/> | <input type="text"/> | <input type="text"/> |
| Other (e.g. MUGA, salivary, GE reflux, gastric emptying etc) | <input type="checkbox"/> | <input type="text"/> | <input type="text"/> |

Compared to usual activity (January 2020 – prior to the begin of the pandemic) : How did PET procedures change?

-100% (complete absence of exams after COVID),

0% (exams as usual)

+100% (double the number of exams)

Not applicable if these studies are not performed in your department

|                                                   | Yes                      | June 2020            | Oct. 2020            |
|---------------------------------------------------|--------------------------|----------------------|----------------------|
| PET/CT FDG (oncology)                             | <input type="checkbox"/> | <input type="text"/> | <input type="text"/> |
| PET/CT FDG (non-oncology)                         | <input type="checkbox"/> | <input type="text"/> | <input type="text"/> |
| PET/CT Gallium 68                                 | <input type="checkbox"/> | <input type="text"/> | <input type="text"/> |
| Others (e.g. C11 based, N13, O15, F choline, etc) | <input type="checkbox"/> | <input type="text"/> | <input type="text"/> |

Compared to usual activity (January 2020 – prior to the begin of the pandemic) : How did radionuclide therapy procedures change?

-100% (complete absence of exams after COVID),

0% (exams as usual)

+100% (double the number of exams)

Not applicable if these studies are not performed in your department

|                     | Yes                      | June 2020            | Oct. 2020            |
|---------------------|--------------------------|----------------------|----------------------|
| Thyroid (malignant) | <input type="checkbox"/> | <input type="text"/> | <input type="text"/> |
| Thyroid (benign)    | <input type="checkbox"/> | <input type="text"/> | <input type="text"/> |

|                                              |                          |                      |                      |
|----------------------------------------------|--------------------------|----------------------|----------------------|
| Peptide receptor radionuclide therapy (PRRT) | <input type="checkbox"/> | <input type="text"/> | <input type="text"/> |
| Prostate-specific membrane antigen (PSMA)    | <input type="checkbox"/> | <input type="text"/> | <input type="text"/> |
| Bone pain palliation                         | <input type="checkbox"/> | <input type="text"/> | <input type="text"/> |
| Selective internal radiation therapy (SIRT)  | <input type="checkbox"/> | <input type="text"/> | <input type="text"/> |
| Radiosynoviorthesis (RSO)                    | <input type="checkbox"/> | <input type="text"/> | <input type="text"/> |
| Other                                        | <input type="checkbox"/> | <input type="text"/> | <input type="text"/> |

## Personal Protective Equipment (PPE)

Was there a shortage of PPE in your department for you and your employees in June 2020?

Yes  No

Was there a shortage of PPE in your department for you and your employees in October 2020?

Yes  No

For how many days do you currently have personal protective equipment on stock for you and your employees?

- Less than 2 days  
 2-7 days  
 7-14 days  
 14-28 days  
 more than 28 days

## Employee Health and Organizational Adjustments to the COVID-19 Crisis

Have employees in your department been infected with COVID-19?

No

infected with COVID-19:

- Yes, less than 20% of the employees
- Yes, 20%-40% of the employees
- Yes, 40%-60% of the employees

Have employees in your department been relocated to other clinical departments or areas?

- No
- Yes, less than 20% of the employees
- Yes, 20%-40% of the employees
- Yes, 40%-60% of the employees

If the answers to the previous question is yes; Have they returned to your department?

- No
- Yes, less than 20% of the employees
- Yes, 20%-40% of the employees
- Yes, 40%-60% of the employees

Were there changes in the typical working hours?

- No
- Yes, less than 20% of the employees
- Yes, 20%-70% of the employees
- Yes, more than 70% of the employees

Have there been lay-offs or furlough in your department due to COVID-19?

- No
- Yes, less than 20% of the employees
- Yes, 20%-70% of the employees
- Yes, more than 70% of the employees

Are there any other organizational adjustments to the COVID-19 crisis in your department?

## Supply of radioactive and other essential materials

Did you adjust your orders of Mo/Tc generators?

- No
- Yes, we have unsubscribed our generators
- Yes, we are still ordering less than 20% of our normally ordered activity

Yes, we are still ordering 20-70% of our normally ordered activity

Yes, we are still ordering >70% of our normally ordered activity

**Has your department's supply of the following essential materials been sufficient?  
Not applicable if these studies are not performed in your department**

|                                     | Yes                      | June 2020            | Oct. 2020            |
|-------------------------------------|--------------------------|----------------------|----------------------|
| Mo/Tc generators                    | <input type="checkbox"/> | <input type="text"/> | <input type="text"/> |
| 18 F-FDG                            | <input type="checkbox"/> | <input type="text"/> | <input type="text"/> |
| Other 18 F labelled tracers         | <input type="checkbox"/> | <input type="text"/> | <input type="text"/> |
| Gallium 68 Generators               | <input type="checkbox"/> | <input type="text"/> | <input type="text"/> |
| Iodine 131                          | <input type="checkbox"/> | <input type="text"/> | <input type="text"/> |
| Lutetium 177                        | <input type="checkbox"/> | <input type="text"/> | <input type="text"/> |
| Radium 223                          | <input type="checkbox"/> | <input type="text"/> | <input type="text"/> |
| Yttrium 90                          | <input type="checkbox"/> | <input type="text"/> | <input type="text"/> |
| Samarium 153                        | <input type="checkbox"/> | <input type="text"/> | <input type="text"/> |
| Cold kits                           | <input type="checkbox"/> | <input type="text"/> | <input type="text"/> |
| Others (e.g. P32, Er169, Re186 ...) | <input type="checkbox"/> | <input type="text"/> | <input type="text"/> |

For how long do you anticipate the COVID-19 pandemic will affect your department in relation to SPECT studies?

- 6 months
- 1 year
- 5 years
- more than 5 years
- we will not be recovered

For how long do you anticipate the COVID-19 pandemic will affect your department in relation to PET/CT studies?

- 6 months
- 1 year
- 5 years
- more than 5 years
- we will not be recovered

What are your fears concerning the current situation?

- Not being able to pay debts
- Decrease in salaries
- Reduction of staff
- Not being able to recover the usual number of procedures
- Not being able to get the needed supplies
- Other please specify

*Please specify other fears*

What opportunities do you see in the current situation?

- Increases in the use of technology for virtual meetings
- Optimizing use of resources
- Reduction of staff
- Increase in the use of PET technology
- Resilience in crisis management
- Other opportunities

*Please specify other opportunities*

---
